# Supplementary figures and images for: Sex-Specific Differences in Toxicity Following Systemic Paclitaxel Treatment and Localized Cardiac Radiotherapy
Source: Preprints.org preprint supplement (doi:10.20944/preprints202106.0593.v1), 2021-06-24

Supplementary Figure 1

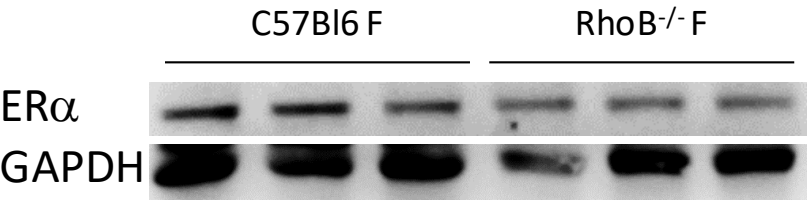

Supplementary Figure 2

A

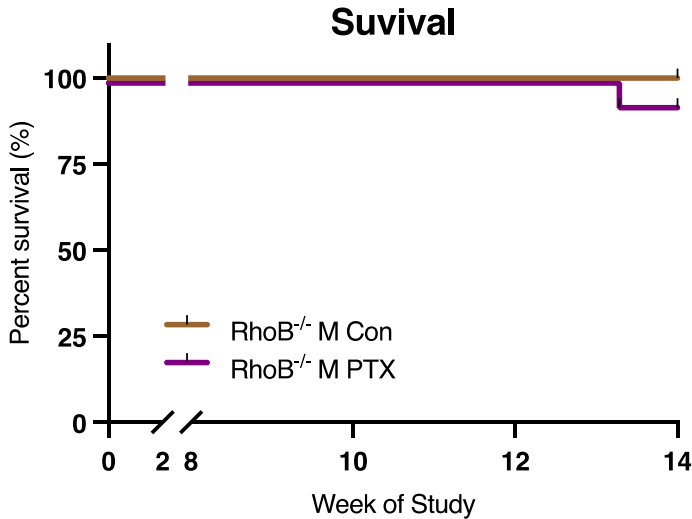

B

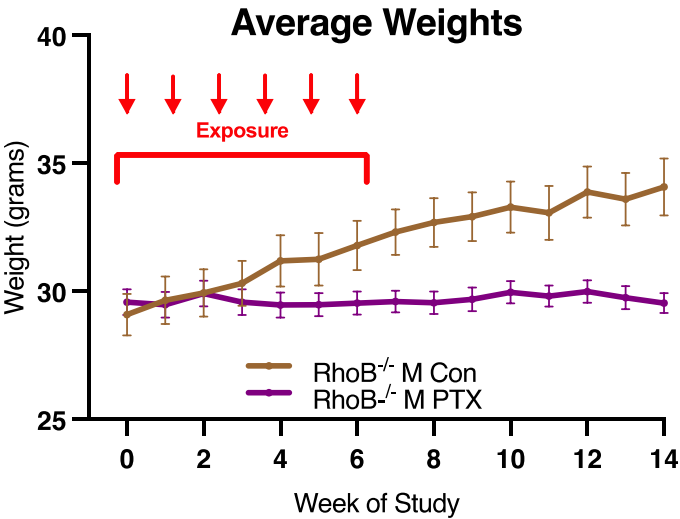

Supplement: Supplementary file 1 [file supplementary]
